# Supplementary material
Source: PubMed Central journal article supplement (PMC3754498)

**Figure S1.** Expression of CD40 and levels of IL-8 in supernatants after using range concentrations of 0.1, 1, 10 and 100  $\mu\text{g/mL}$  of EA, SR, WS and MI.  $\downarrow$  designs results obtained for the concentration 10  $\mu\text{g/mL}$ , which was selected for further exposure assays.

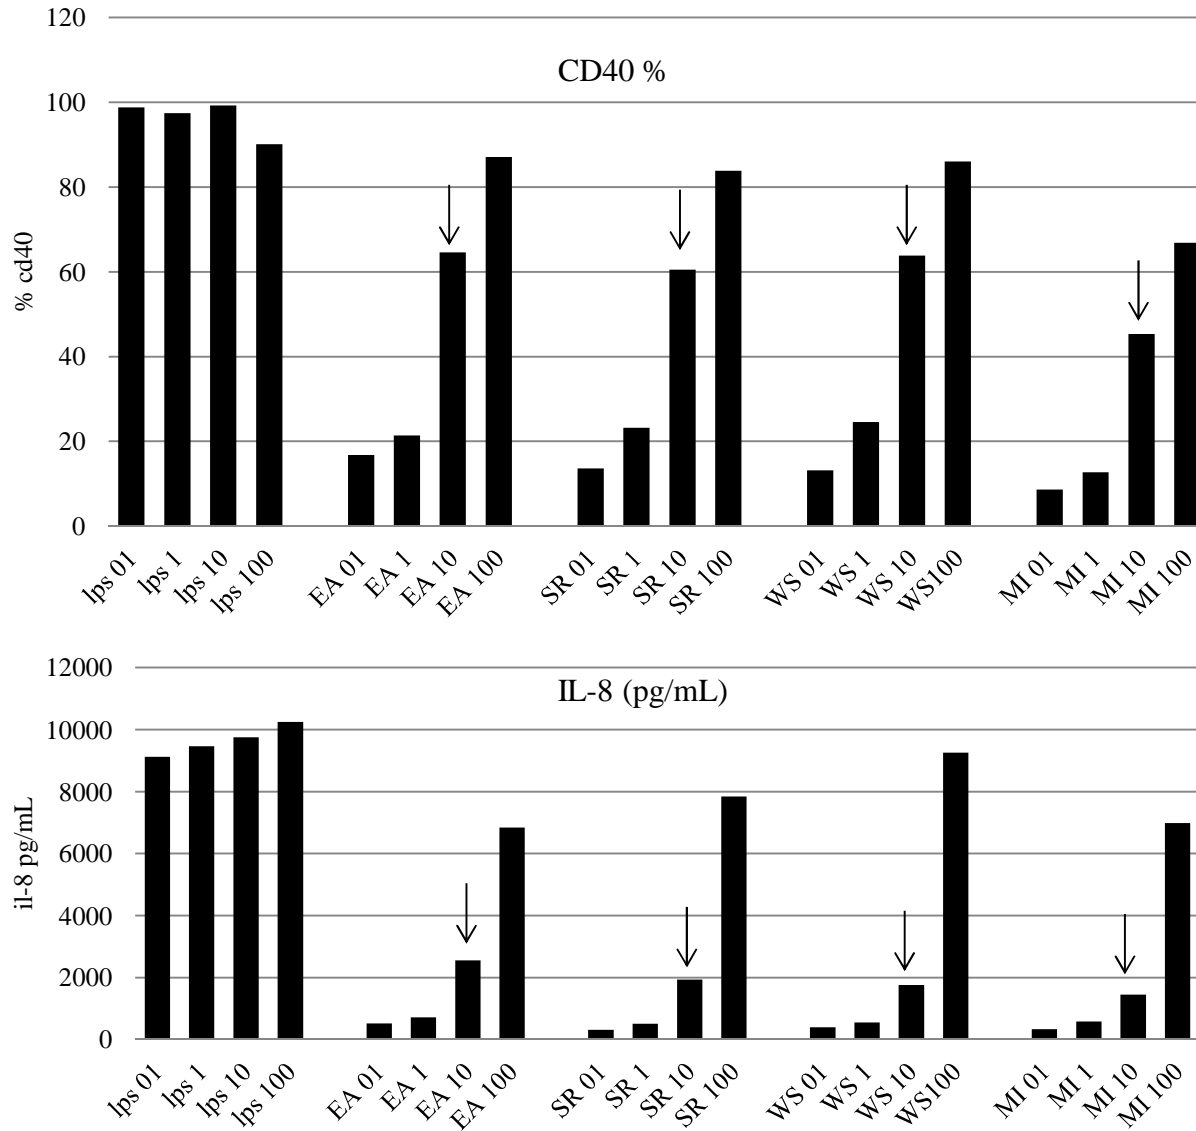

**Figure S2.** Mixed Lymphocytic Reactions (MLR) testing different MoDC:T cell ratio (1:2; 1:5; 1:10 and 1:100) using MoDC previously exposed to LPS.

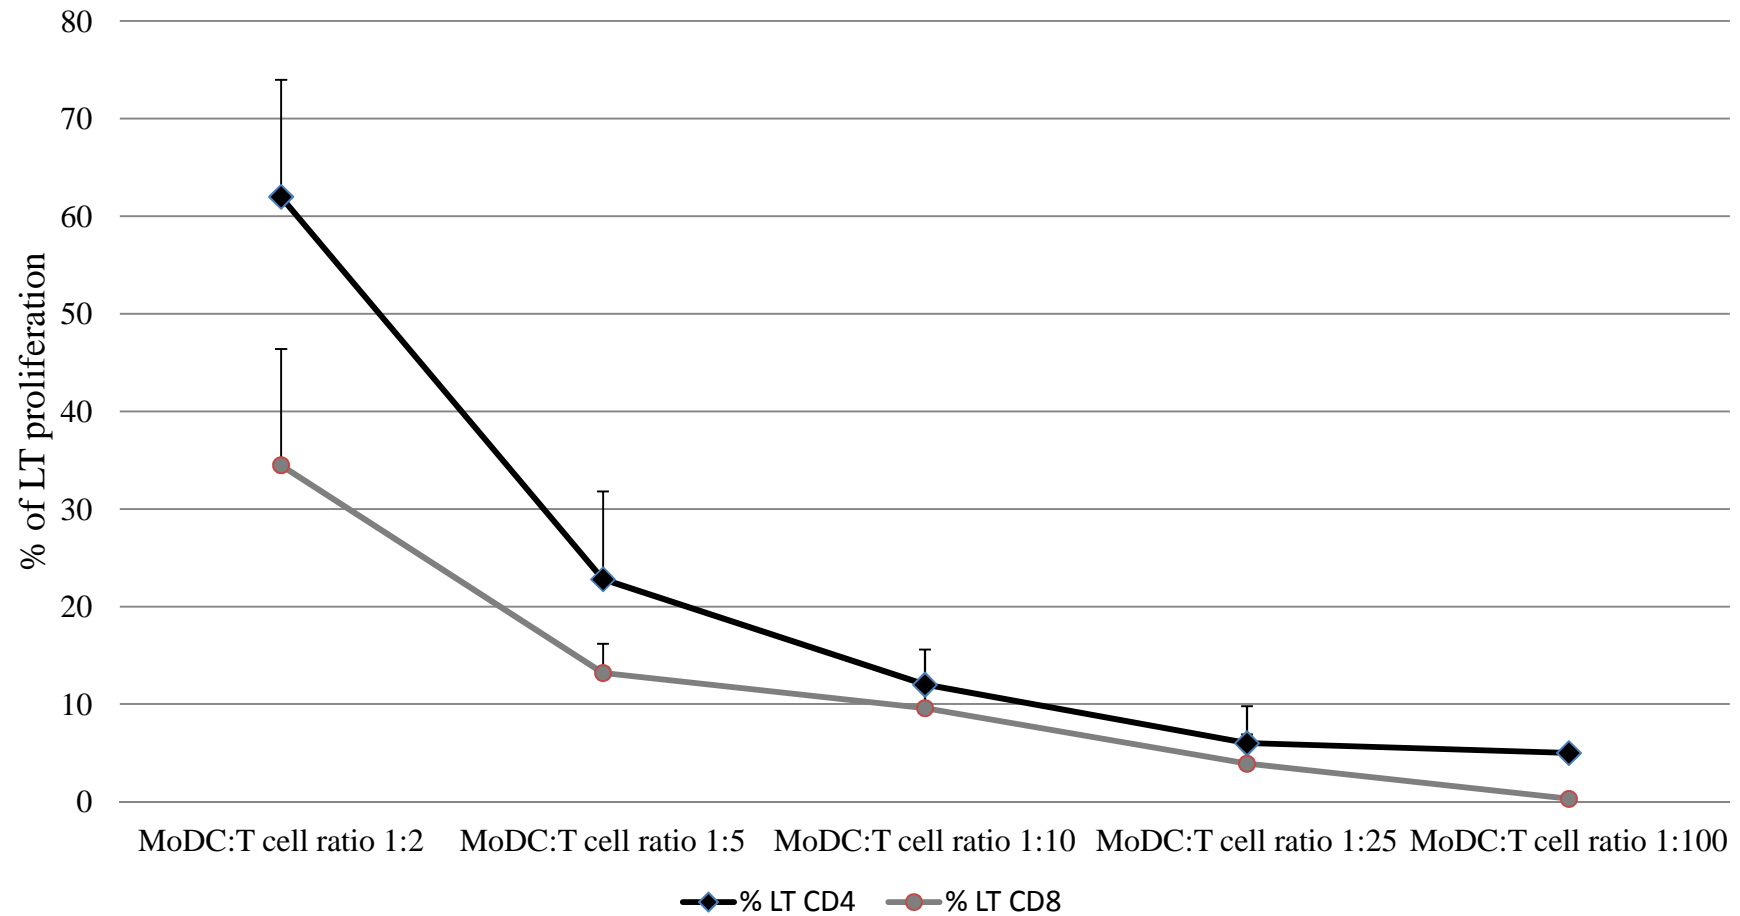

Supplement: CVI.00043-13_zcd999094784so1.pdf [file CVI.00043-13_zcd999094784so1.pdf]
